# Supplementary material
Source: PubMed Central journal article supplement (PMC4054142)
Supplement: AEM.04219-13_zam999105427so1.pdf [file AEM.04219-13_zam999105427so1.pdf]

**TABLE S1** Volatile compounds detected in fermented grains collected on initial day from the four fermentation batches ( $\mu\text{g}/100\text{g}$ )

|                                     | The 1 <sup>st</sup> liquor | The 2 <sup>nd</sup> liquor | The 3 <sup>rd</sup> liquor | The 4 <sup>th</sup> liquor |
|-------------------------------------|----------------------------|----------------------------|----------------------------|----------------------------|
| Ethyl tetradecanoate                | 33.28 $\pm$ 1.32           | 36.07 $\pm$ 0.01           | 33.05 $\pm$ 4.25           | 26.59 $\pm$ 3.59           |
| Acetic acid                         | 46.97 $\pm$ 1.86           | 51.32 $\pm$ 0.57           | 52.66 $\pm$ 0.18           | 51.85 $\pm$ 1.68           |
| Ethyl hexadecanoate                 | 36.84 $\pm$ 2.87           | 31.94 $\pm$ 1.69           | 34.51 $\pm$ 1.45           | 32.28 $\pm$ 1.19           |
| Octanoic acid                       | 9.08 $\pm$ 0.73            | 10.53 $\pm$ 0.14           | 11.59 $\pm$ 1.92           | 14.15 $\pm$ 2.14           |
| Isoamyl lactate                     | 10.15 $\pm$ 0.88           | 9.70 $\pm$ 2               | 12.45 $\pm$ 2.11           | 8.36 $\pm$ 0.55            |
| Ethyl 3-phenylpropionate            | 4.90 $\pm$ 0.55            | 5.99 $\pm$ 0.11            | 5.31 $\pm$ 0.65            | 4.27 $\pm$ 0.48            |
| Ethyl 9-hexadecenoate               | 108.31 $\pm$ 3.17          | 109.16 $\pm$ 10.71         | 134.89 $\pm$ 4.27          | 134.48 $\pm$ 13.39         |
| Phenylethanol                       | 416.09 $\pm$ 47.5          | 509.99 $\pm$ 9.84          | 501.69 $\pm$ 17.79         | 517.05 $\pm$ 31.72         |
| 2-Methoxy-4-methylphenol            | 7.75 $\pm$ 0.7             | 7.27 $\pm$ 1.43            | 10.69 $\pm$ 0.55           | 10.70 $\pm$ 1.63           |
| Pentadecanoic acid ethyl ester      | 6.86 $\pm$ 0.59            | 7.89 $\pm$ 0.31            | 6.89 $\pm$ 0.61            | 5.95 $\pm$ 0.63            |
| 1-Octen-3-ol                        | 8.97 $\pm$ 0.25            | 8.88 $\pm$ 0.74            | 10.54 $\pm$ 0.11           | 10.26 $\pm$ 0.73           |
| 2,3-Butanediol                      | 34.95 $\pm$ 1.88           | 40.18 $\pm$ 1.76           | 39.39 $\pm$ 6.39           | 28.45 $\pm$ 3.69           |
| Ethyl phenylacetate                 | 19.42 $\pm$ 1.63           | 21.32 $\pm$ 2.2            | 16.29 $\pm$ 0.52           | 16.52 $\pm$ 1.91           |
| Isopentyl acetate                   | 35.05 $\pm$ 0.57           | 33.40 $\pm$ 0.62           | 35.28 $\pm$ 4.52           | 42.31 $\pm$ 3.61           |
| 2-Furanmethanol                     | 7.99 $\pm$ 0.84            | 7.27 $\pm$ 1.49            | 9.80 $\pm$ 0.9             | 7.76 $\pm$ 0.17            |
| 2-Phenylethyl acetate               | 26.76 $\pm$ 2.11           | 30.50 $\pm$ 1.03           | 27.84 $\pm$ 0.66           | 26.98 $\pm$ 0.64           |
| Hexanoic acid                       | 32.22 $\pm$ 2.17           | 36.92 $\pm$ 0.14           | 37.42 $\pm$ 0.28           | 36.95 $\pm$ 1.51           |
| Ethyl caprate                       | 15.23 $\pm$ 0.18           | 16.15 $\pm$ 1.84           | 19.78 $\pm$ 0.39           | 17.98 $\pm$ 1.36           |
| Ethyl hexanoate                     | 22.82 $\pm$ 0.83           | 27.24 $\pm$ 3.76           | 35.61 $\pm$ 0.56           | 33.45 $\pm$ 4.73           |
| Furfural                            | 74.42 $\pm$ 1.2            | 74.87 $\pm$ 2.97           | 67.72 $\pm$ 1.2            | 67.70 $\pm$ 3.57           |
| Ethyl acetate                       | 603.07 $\pm$ 31.3          | 633.02 $\pm$ 51.46         | 540.74 $\pm$ 23.88         | 599.85 $\pm$ 11.94         |
| Ethyl lactate                       | 1900.27 $\pm$ 77.2         | 1953.63 $\pm$ 156.15       | 1677.59 $\pm$ 78.08        | 1871.13 $\pm$ 39.47        |
| Ethyl octanoate                     | 7.95 $\pm$ 3.13            | 20.32 $\pm$ 8.09           | 32.94 $\pm$ 6.44           | 17.08 $\pm$ 3.22           |
| Isoamyl alcohol                     | 74.81 $\pm$ 2.18           | 58.93 $\pm$ 15.93          | 27.69 $\pm$ 3.63           | 44.86 $\pm$ 13.39          |
| Geranyl acetone                     | 9.88 $\pm$ 0.31            | 10.64 $\pm$ 0.15           | 11.27 $\pm$ 0.43           | 11.67 $\pm$ 0.74           |
| Ethyl isobutyrate                   | 27.64 $\pm$ 2.76           | 32.37 $\pm$ 1.61           | 29.28 $\pm$ 0.45           | 30.08 $\pm$ 0.23           |
| 3-Hydroxy-butanoic acid ethyl ester | 210.43 $\pm$ 5.55          | 200.13 $\pm$ 2.1           | 217.15 $\pm$ 17.78         | 242.77 $\pm$ 17.1          |
| 1-Nonanol                           | 12.47 $\pm$ 1.29           | 15.03 $\pm$ 0.24           | 15.04 $\pm$ 0.74           | 15.81 $\pm$ 1.14           |
| 5-Heptyldihydro-2-(3H)-furanone     | 31.05 $\pm$ 0.67           | 34.20 $\pm$ 2.44           | 37.81 $\pm$ 2.21           | 32.72 $\pm$ 0.56           |
| Isooctanol                          | 53.64 $\pm$ 1.88           | 49.06 $\pm$ 0.82           | 49.43 $\pm$ 2.99           | 54.90 $\pm$ 1.22           |
| Butanoic acid ethyl ester           | 23.53 $\pm$ 0.56           | 23.38 $\pm$ 1.9            | 20.17 $\pm$ 1.16           | 22.95 $\pm$ 0.46           |
| Butanoic acid                       | 30.98 $\pm$ 0.56           | 31.54 $\pm$ 0.87           | 30.18 $\pm$ 0.69           | 31.58 $\pm$ 0.1            |
| Nonanoic acid                       | 40.35 $\pm$ 0.38           | 38.62 $\pm$ 1.29           | 36.05 $\pm$ 0.23           | 37.42 $\pm$ 1.25           |
| 2-Heptanol                          | 9.76 $\pm$ 0.36            | 10.77 $\pm$ 0.25           | 11.07 $\pm$ 0.23           | 10.43 $\pm$ 0.2            |
| Ethyl dodecanoate                   | 9.02 $\pm$ 0.11            | 9.40 $\pm$ 0.22            | 10.16 $\pm$ 0.41           | 10.55 $\pm$ 0.69           |
| 2-Propenyl phenylacetate            | 55.62 $\pm$ 1.95           | 58.12 $\pm$ 2.32           | 52.94 $\pm$ 0.38           | 53.35 $\pm$ 1.72           |
| 3-Hydroxy-2-butanone                | 43.24 $\pm$ 2.81           | 48.44 $\pm$ 1.09           | 45.57 $\pm$ 0.8            | 44.21 $\pm$ 0.48           |
| $\gamma$ -Nonalactone               | 26.36 $\pm$ 1.47           | 28.82 $\pm$ 0.92           | 27.22 $\pm$ 0.49           | 28.05 $\pm$ 0.31           |
| 2-Methyl-1-propanol                 | 7.73 $\pm$ 0.81            | 9.14 $\pm$ 0.42            | 8.24 $\pm$ 0.01            | 8.23 $\pm$ 0.03            |

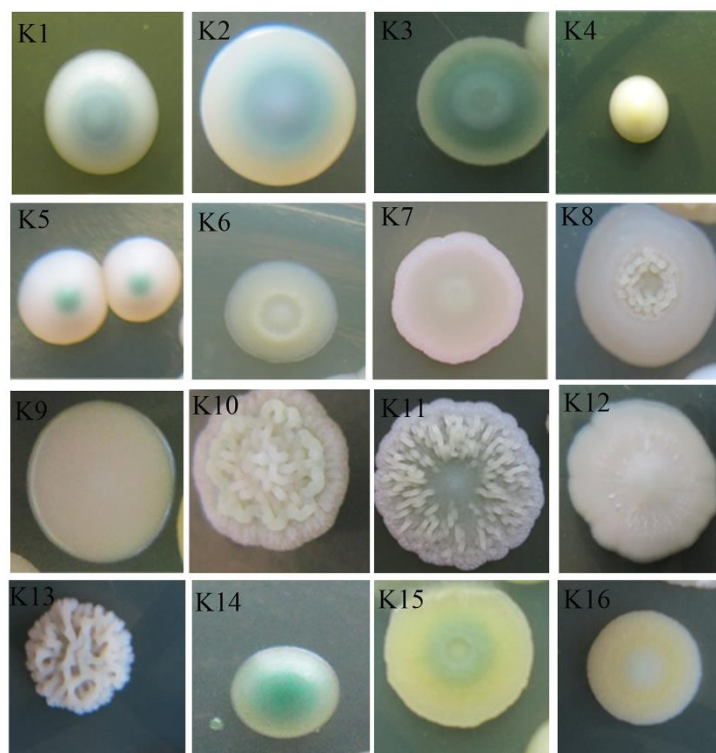

**FIG S1** Morphology of yeasts colonies cultured on WL medium. Based on colony morphology and color, 16 representative colonies were observed in all the plates (K1-K16). Based on colony frequency, 160 representative colonies were proportionally isolated for sequencing analysis of the D1 /D2 domain of the 26S rDNA region.

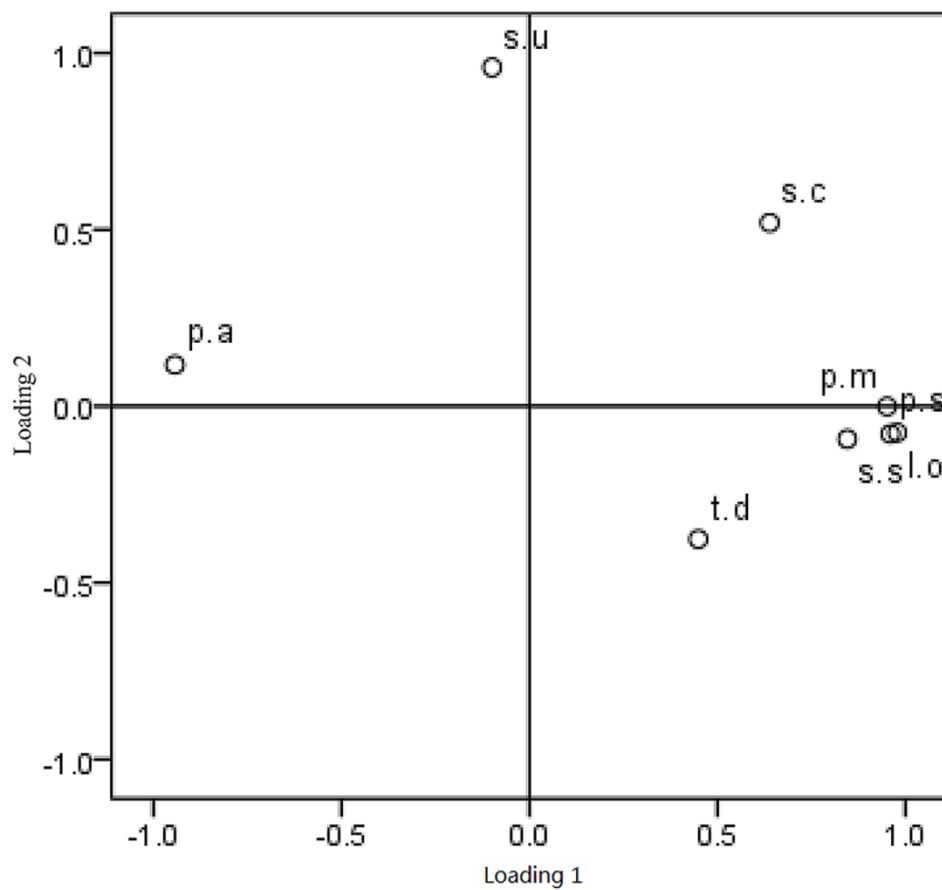

**FIG S2** The loading plot of PCA based on the dynamics of the yeast community showed the characteristic yeast in different fermentation batches.
